# Supplementary material for: Efficient synthesis of fluorescent-PET probes based on [18F]BODIPY dye
Source: Royal Society of Chemistry journal article supplement (doi:10.1039/c4cc01411a), 2014-01-01
Supplement: c4cc01411a1.pdf [file c4cc01411a1.pdf]

**Efficient synthesis of fluorescent-PET probes based on [<sup>18</sup>F]bodipy dye**

Shuanglong Li,<sup>a</sup> Dan Li,<sup>a</sup> Zhe Zhang,<sup>b</sup> G. K. Surya Prakash,<sup>b</sup> Peter S. Conti,<sup>a</sup> and Zibo Li<sup>a,\*</sup>

<sup>a</sup> *Molecular Imaging Center, Radiology Department, University of Southern California, 2250 Alcazar St CSC103, Los Angeles, CA, United States. Fax: 001 323-442-3253; Tel: 001-323-442-3252; E-mail: ziboli@usc.edu*

<sup>b</sup> *Loker Hydrocarbon Research Institute, Department of Chemistry, University of Southern California, Los Angeles, California 90089-1661, United States.*

## Materials and Methods

The synthetic and radiosynthetic work was carried out with the following equipment and methods. The syringe filter and polyethersulfone membranes (pore size, 0.22  $\mu\text{m}$ ; diameter, 13 mm) were obtained from Nalge Nunc International (Rochester, NY). Analytical reversed-phase high-performance liquid chromatography (HPLC) was accomplished on a Waters 515 chromatography system with a Waters 2487 dual  $\lambda$  absorbance detector and model 2200 scaler-ratemeter radiation detector from Ludlum Measurements, Inc. (Sweetwater, TX). Empower 2 software from Waters Corporation (Milford, MA) was used to record chromatograms. HPLC was performed on a phenomenex Luna 5 $\mu$  C18 column (250  $\times$  4.6 mm). The flow was 1 mL/min, with the mobile phase starting from 80% solvent A (0.1% TFA in water) and 20% solvent B (0.1% TFA in MeCN) (0–2 min) to 5% solvent A and 95% solvent B at 22 min.  $^1\text{H}$ , and  $^{13}\text{C}$  spectra were recorded on 400 MHz Varian NMR spectrometers.  $^1\text{H}$  NMR chemical shifts were determined relative to trace amount solvent as the internal standard. Mass spectra were recorded on a Bruker 300-MS TQ mass spectrometer in the EI mode.

### Syntheses of BODIPY®FL-RGD and BODIPY®R6G-RGD<sub>2</sub>

Commercially available BODIPY®FL NHS ester (1.5  $\mu\text{mol}$ ) in 50  $\mu\text{L}$  DMSO, *c*(RGDyK) (0.66  $\mu\text{mol}$ , denoted as RGD) and *N,N*-diisopropylethylamine (5  $\mu\text{L}$ ) were mixed together. After 2 h incubation at room temperature, the reaction mixture was subjected to HPLC purification. BODIPY®FL-RGD ( $R_t$  = 16.9 min) was obtained in 81% yield. The final product was characterized by Thermo LTQ FT mass spectrometry ( $m/z$  942.4 for  $[\text{MH}]^+$ ,  $\text{C}_{45}\text{H}_{55}\text{BF}_2\text{N}_{11}\text{O}_9$ , calculated  $[\text{MH}]^+$ : 942.4).

Commercially available BODIPY®R6G NHS ester (1.5 μmol) in 50 μL DMSO, PEGylated *c*(RGDyK) dimer (1.0 μmol, denoted as RGD<sub>2</sub>) and *N,N*-diisopropylethylamine (5 μL) were mixed together. After 2 h incubation at room temperature, the reaction mixture was subjected to HPLC purification. BODIPY®R6G-RGD<sub>2</sub> (Rt = 18.5 min) was obtained in 73% yield. The final product was characterized by Thermo LTQ FT mass spectrometry (*m/z* 2069.1 for [MH]<sup>+</sup>, C<sub>96</sub>H<sub>130</sub>BF<sub>2</sub>N<sub>24</sub>O<sub>25</sub>, calculated [MH]<sup>+</sup>: 2069.0). <sup>1</sup>H NMR (400 MHz, DMSO) δ 1.01 (br, 1H), 1.17-1.48 (m, 18H), 1.69-1.71 (m, 3H), 2.02-2.08 (m, 3H), 2.34-2.45 (m, 2H), 2.66-2.75 (m, 5H), 2.94-3.25 (m, 11H), 4.49 (s, 2H), 4.57-4.59 (m, 2H), 6.36 (br, 1H), 6.61-6.63 (m, 4H), 6.90-6.92 (m, 4H), 7.01-7.57 (m, 15H), 7.74-7.95 (m, 6H), 8.03-8.05 (m, 5H), 8.16-8.19 (m, 1H), 8.28 (br, 2H), 11.33 (s, 1H), 12.50 (s, 1H).

### The NMR and MS of BODIPY-PACMA31 and BAP-1

4,4-Difluoro-3-*{(E)-{2-(4-dimethylaminophenyl)ethenyl}}*-1-methyl-4-bora-3a,4a-diaza-*s*-indacene (BAP-1). <sup>1</sup>H NMR (400 MHz, DMSO) δ 2.27 (s, 3H), 2.99 (s, 6H), 6.42 (dd, *J* = 3.8, 2.2 Hz, 1H), 6.77 (d, *J* = 9.0 Hz, 2H), 6.94 (d, *J* = 3.7 Hz, 1H), 7.06 (s, 1H), 7.16 (d, *J* = 15.9 Hz, 1H), 7.48 (d, *J* = 9.0 Hz, 1H), 7.50 (m, 2H), 7.66 (d, *J* = 16.0 Hz, 1H), 7.60 (s, 1H). <sup>13</sup>C NMR (100 MHz, DMSO) δ 11.6, 40.2, 111.9, 112.1, 112.7, 116.0, 118.5, 121.9, 123.3, 124.4, 130.5, 132.8, 136.2, 138.6, 143.6, 146.1, 152.5, 160.8. MS (EI) *m/z* 351.3 (M<sup>+</sup>). Chemical Formula: C<sub>20</sub>H<sub>20</sub>BF<sub>2</sub>N<sub>3</sub>, calculated molecular weight: 351.2.

*N*-*{2-[(2-[(2-[2,4-dimethoxy(propioloyl)anilino]-2-(2-thienyl)acetyl]amino}acetyl)amino]ethyl carbamoyl}* phenyl-1,3,5,7-tetramethyl-2,6-diethyl-4-bora-3a,4a-diaza-*s*-indacene (BODIPY-PACMA31). <sup>1</sup>H NMR (500 MHz, DMSO) δ 1.29 (s, 6H), 2.42 (s, 6H), 2.63 (s, 1H), 4.47 (m, 1H), 6.03 (m, 1H), 6.16 (m, 2H), 6.33-6.37 (m, 2H), 6.76 (m, 1H), 6.87 (m, 1H), 7.28-7.31 (m,

2H), 7.41-7.43 (m, 2H), 7.79 (m, 1H), 7.97-7.99 (m, 2H), 8.55-8.63 (m, 1H). MS (EI)  $m/z$  794.2 ( $M^+$ ), 795.4 ( $[M+H]^+$ ). Chemical Formula ( $[M+H]^+$ ):  $C_{41}H_{42}BF_2N_6O_6S$ , calculated molecular weight: 795.3.

## Radiolabeling

$[^{18}F]$ Fluoride was produced by the  $^{18}O(p,n)^{18}F$  reaction in  $[^{18}O]$ water using a CTI/Siemens RDS112 11MeV cyclotron.  $[^{18}F]$ fluoride was trapped by a QMA cartridge and eluted off with tetrabutylammonium bicarbonate (TBAB) into a 5-mL V-vial (Type I Borosilicate), followed by azeotropic drying with anhydrous MeCN.  $[^{18}F]$ fluoride was then dissolved in anhydrous MeCN for the labeling reactions.

BODIPY®FL-RGD (0.2  $\mu$ mol) in 50  $\mu$  anhydrous DMSO was mixed with chlorides shown in Table 1. After violently shaking for 1 min, the resulting solution was added  $[^{18}F]$ fluoride ( $10 \pm 3$  mCi) in MeCN. After shaking at room temperature for 10 min, an aliquot of the reaction mixture (50–100  $\mu$ Ci) was collected for HPLC analysis. Integration of the radio-chromatogram was used for the yield calculation.

$[^{18}F]$ BODIPY®R6G,  $[^{18}F]$ BODIPY-PACMA31, and  $[^{18}F]$ BAP-1 utilized the same protocol for  $[^{18}F]$ fluorination. As an example, BODIPY®R6G (0.2  $\mu$ mol) in 50  $\mu$ l anhydrous MeCN was added to  $SnCl_4$  (3.0  $\mu$ mol). The resulting solution was then mixed with  $[^{18}F]$ fluoride ( $10 \pm 3$  mCi). After shaking at room temperature for 10 min, an aliquot of the reaction mixture (50–100  $\mu$ Ci) was collected for HPLC analysis. Integration of the radio-chromatogram was used for the yield calculation.

For the synthesis of  $[^{18}F]$ BODIPY®R6G-RGD<sub>2</sub>, the HPLC eluent containing  $[^{18}F]$ BODIPY®R6G was collected and the solvent was removed under reduced pressure.

[<sup>18</sup>F]BODIPY®R6G was azeotropically dried twice with anhydrous MeCN under reduced pressure at 85 °C. Then [<sup>18</sup>F]BODIPY®R6G (~2 mCi) was taken with 100 µl MeCN and added to 0.2 µmol RGD<sub>2</sub> in 50 µl DMSO. After addition of 10 µl diisopropylethylamine, the reaction remained at 55 °C with slightly shaking. After 15 min, the reaction was quenched with 5% acetic acid and purified with HPLC. After removing the HPLC solvent from [<sup>18</sup>F]BODIPY®R6G-RGD<sub>2</sub> by rotary evaporation and the activity was reconstituted in 1 mL phosphate-buffered saline (PBS) and passed through a 0.22 µm syringe filter for *in vivo* animal experiments.

### **MicroPET Imaging**

Animal procedures were performed according to a protocol approved by the University of Southern California Institutional Animal Care and Use Committee. The detailed procedure was published previously.<sup>1</sup> In brief, each mouse was injected with 50 ± 10 µCi of the [<sup>18</sup>F] probe via the tail vein. The imaging data were achieved with the mice under anesthesia using isoflurane (5% for induction and 2% for maintenance in 100% O<sub>2</sub>). The regions of interest (ROIs) were converted to counts per gram per min based on the assumption of 1 g/mL tissue density. Dividing counts per gram per minute by injected dose gave the image ROI derived %ID/g values.

### **Fluorescence imaging**

*In vivo* fluorescence imaging was performed using the Xenogen Lumina XR Imaging System and analyzed using the IVIS Living Imaging 3.0 software (Caliper Life Sciences, Alameda, CA, USA). A Cy5.5 filter set was used for acquiring the fluorescence of BODIPY®R6G-RGD<sub>2</sub> peptide. Identical illumination settings (lamp voltage, filters, f/stop, field

of views, binning) were used for acquiring all images. Fluorescence emission images were normalized and reported as photons per second per centimeter squared per steradian (p/s/cm<sup>2</sup>/sr).

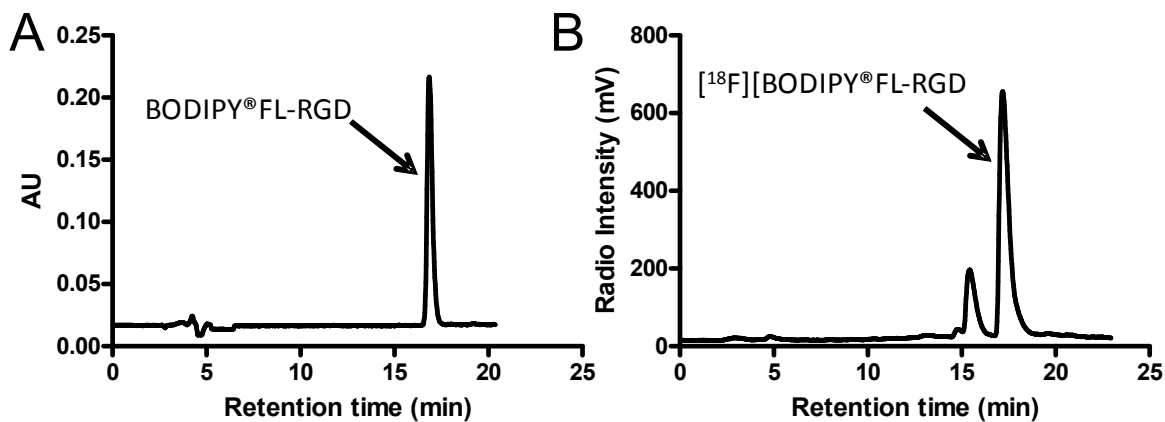

Figure 1. HPLC profiles. A. The UV trace of standard BODIPY®FL-RGD. B. The radio-trace of the crude reaction mixture of Entry 3 in Table 1.

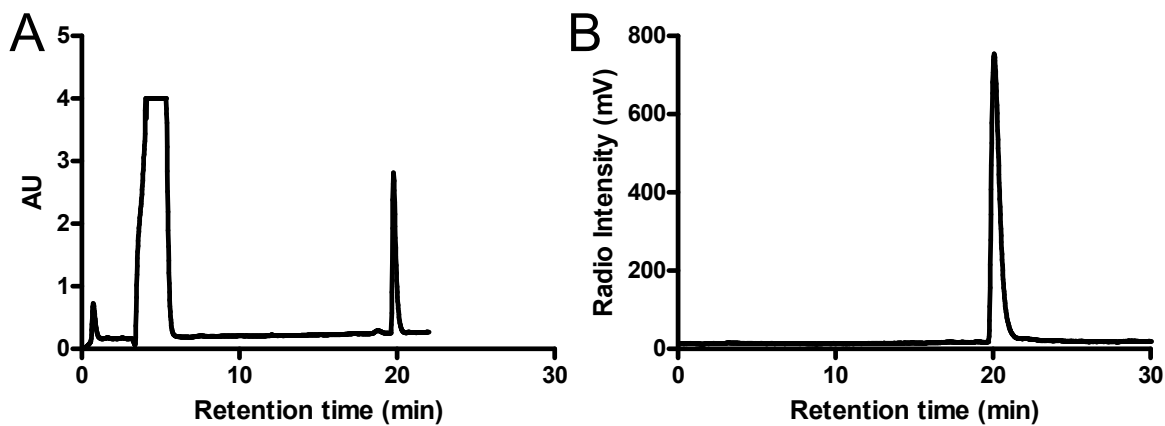

Figure 2. HPLC profiles. A. The UV trace of standard BODIPY-PACMA31. B. The radio-trace of the crude reaction mixture of [<sup>18</sup>F]fluorination of BODIPY-PACMA31.

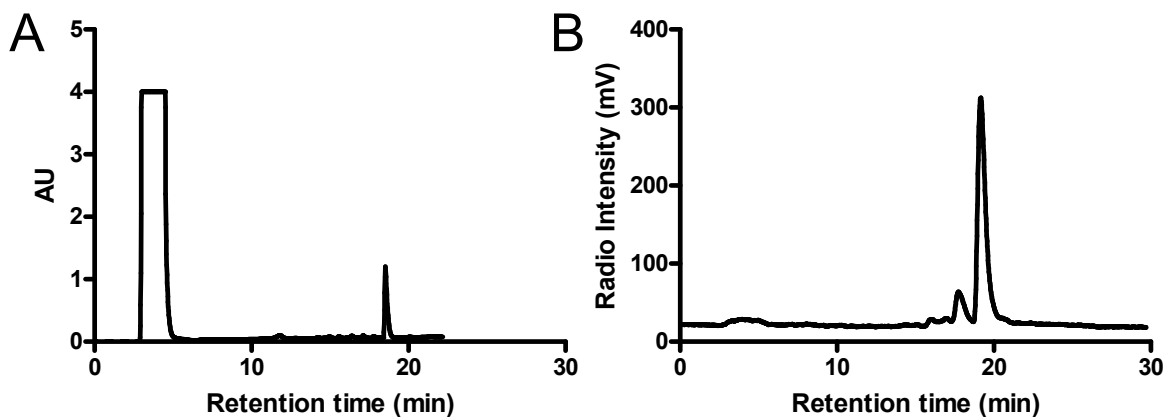

Figure 3. HPLC profiles. A. The UV trace of standard BODIPY@R6G. B. The radio trace of the crude reaction mixture of [ $^{18}\text{F}$ ]fluorination of BODIPY@R6G.

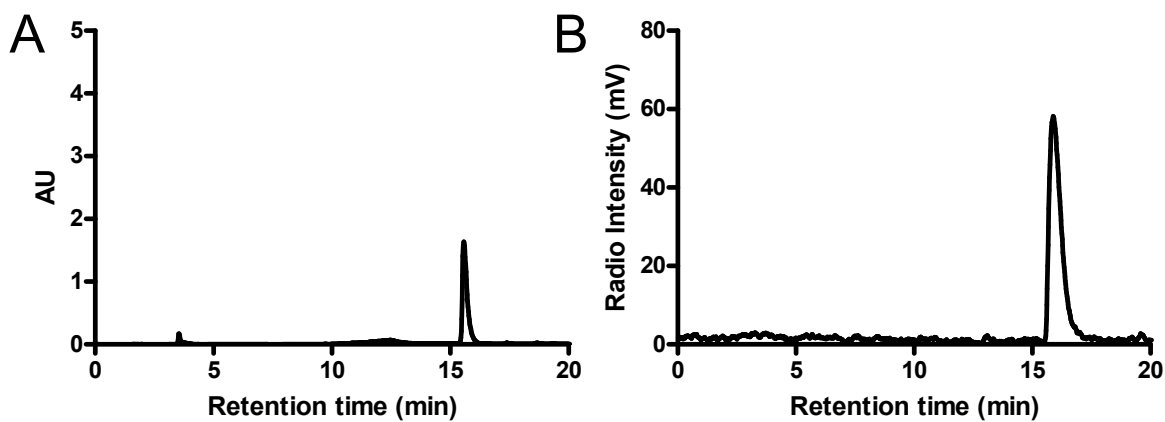

Figure 4. HPLC profiles. A. The UV trace of standard BAP-1. B. The radio trace of the crude reaction mixture of [ $^{18}\text{F}$ ]fluorination of BAP-1.

**Reference:**

1. C. W. Huang, Z. Li, H. Cai, T. Shahinian and P. S. Conti, *Bioconjug Chem*, 2011, **22**, 256-263.
